# Supplementary material for: Glucose-dependent insulinotropic peptide and risk of cardiovascular events and mortality: a prospective study
Source: PubMed Central journal article supplement (PMC7145777; doi:10.1007/s00125-020-05093-9), 2020-01-23

# GLUCOSE-DEPENDENT INSULINOTROPIC PEPTIDE AND RISK OF CARDIOVASCULAR EVENTS AND MORTALITY: A PROSPECTIVE STUDY

## ELECTRONIC SUPPLEMENTARY MATERIAL (ESM)

### **TABLE OF CONTENTS**

|                                                                                                                                                                    |    |
|--------------------------------------------------------------------------------------------------------------------------------------------------------------------|----|
| ESM Methods.....                                                                                                                                                   | 2  |
| <i>Questionnaire at the follow-up visit in PPP-Botnia</i> .....                                                                                                    | 2  |
| ESM Results.....                                                                                                                                                   | 2  |
| Sensitivity analyses .....                                                                                                                                         | 2  |
| <i>PPP-Botnia</i> .....                                                                                                                                            | 2  |
| <i>MDC-CC</i> .....                                                                                                                                                | 2  |
| Exploratory analysis of cardiovascular endpoints.....                                                                                                              | 3  |
| <i>PPP-Botnia</i> .....                                                                                                                                            | 3  |
| <i>MDC-CC</i> .....                                                                                                                                                | 3  |
| ESM Table 2. Selected SNPs for construction of the instrumental variable for the reverse 2SMR analysis                                                             | 4  |
| ESM Table 3. Sensitivity analyses excluding subjects with prevalent diabetes.....                                                                                  | 8  |
| ESM Table 4. Sensitivity analyses in normoglycemic subjects in PPP-Botnia. ....                                                                                    | 9  |
| ESM Table 5. Sensitivity analyses excluding subjects with diabetes in MDC-CC.....                                                                                  | 10 |
| ESM Table 6. Associations of 1 SD fasting and post-challenge GLP-1 increment and outcomes in MDC-CC.....                                                           | 11 |
| ESM Table 7. Complete data on rs1800437 used as instrumental variable in the 2SMR analysis from GIP to CAD/MI using CARDIoGRAMplusC4D and UK Biobank datasets..... | 12 |
| ESM Table 8. Complete data for the reverse 2SMR analyses.....                                                                                                      | 14 |
| ESM Table 9. Single SNP reverse MR analysis from CAD to GIP.....                                                                                                   | 15 |
| ESM Table 10. Associations of rs1800437 and phenotypes in UK biobank.....                                                                                          | 18 |
| ESM Table 11. Associations of rs1800437 and phenotypes in GWAS Atlas .....                                                                                         | 20 |
| ESM Fig. 1. Schematic description of the population included in PPP-Botnia study.....                                                                              | 23 |
| ESM Fig. 2. Schematic description of the population included in Malmö Diet and Cancer Study .....                                                                  | 24 |

## ESM Methods

### *Questionnaire at the follow-up visit in PPP-Botnia*

#### Questions:

- Myocardial infarction: Has a doctor ever diagnosed you with myocardial infarction or a thrombus in the heart?
- Angina pectoris: Has a doctor ever diagnosed you with coronary disease (coronary artery stenosis or angina pectoris)?
- Coronary bypass: Have you undergone coronary bypass surgery?
- Angioplasty: Have you undergone percutaneous coronary intervention?
- Stroke: Has a doctor ever diagnosed you with stroke?

Patients who replied no to all five questions at the basal visit but yes at the follow-up were considered incident cases. Patients who replied yes at the basal visit but no at follow-up were excluded from the analysis.

## ESM Results

### Sensitivity analyses

In order to rule out that the increased mortality was a result of patients being diabetic and hence contributing to a larger extent to total mortality, analyses on associations of GIP and mortality as well as cardiovascular mortality in both cohorts excluding subjects with prevalent diabetes, are presented in Supplementary **ESM Table 3-5**.

#### *PPP-Botnia*

Sensitivity analysis including only individuals who were normoglycemic both at the basal visit and at follow-up were performed. Logistic regression analysis was performed for incident CVD and total CVD (including both prevalent at baseline and at follow-up) in model 1 (adjusted for age and sex and model 2 (adjusted for age, sex, BMI, SBP, fasting/post-challenge plasma glucose, fasting/post-challenge insulin, LDL, HDL and smoking (**Table 4**). CVD includes both prevalent and incident cardiovascular disease. Number of cases was 62 for incident CVD and 130 for total prevalent CVD. The number of controls was 2151.

#### *MDC-CC*

Sensitivity analyses excluding subjects with prevalent (n=545) and incident (n=249) diabetes (n<sub>total</sub>=794) were performed for associations of fasting GIP, post-challenge GIP, , and prevalent and incident CVD (**ESM Table 5**). Logistic regressions were carried out in model 1 (adjusted for age, sex and time to follow-up) and model 2 (adjusted for age, sex, time to follow-up, BMI, SBP, fasting/(post-challenge glucose), fasting/(post-challenge) insulin, LDL, HDL and smoking).

## Exploratory analysis of cardiovascular endpoints

Finally, we performed a cross-sectional, exploratory analysis of GIP concentrations and CVD in order to investigate if the GIP association was specific to any subtype of CVD.

### *PPP-Botnia*

In PPP-Botnia, fasting GIP was associated with total prevalence of CVD (n=4375; 408 events; OR[CI(95%)]=1.16[1.04-1.31]; p=0.009) in *Model 2*. This association was attenuated in *Model 3* (OR[CI(95%)]=1.10[0.98-1.24]; p=0.125). Post-challenge GIP was associated with total prevalence of CVD (n=4360; 358 events; OR[CI(95%)]=1.26[1.02-1.55]; p=0.031) in *Model 3*.

In cross-sectional, logistic regression analyses of the five subcategories of CVD defined in the questionnaire (myocardial infarction, angina pectoris, coronary artery bypass grafting, angioplasty and stroke), fasting GIP concentration was associated with myocardial infarction (OR[CI(95%)]=1.25[1.01-1.55]; p=0.048) in *Model 3* (non-significant associations not shown).

No analyses of GIP levels and prevalent heart failure were carried out in PPP-Botnia due to lack of data on heart failure.

### *MDC-CC*

In MDC-CC, fasting GIP was associated with total prevalence of CVD at follow-up (n=3268; 638 events; OR[CI(95%)]=1.14[1.03-1.26]; p=0.009) in *Model 3*. As for post-challenge GIP, each 1 SD increment in post-challenge GIP was associated with total CVD at follow-up in *Model 2* (n=2898; 501 events; OR [CI(95%)]=1.18[1.00-1.25]; p=0.047), but the association was attenuated when the model was further adjusted according to *Model 3* (OR[CI(95%)]=1.08[0.97-1.21]; p=0.164).

Further, logistic regression analyses of subcategories of prevalent CVD revealed no significant associations of fasting and post-challenge GIP for any of the five subtypes of CVD (angioplasty, coronary events, major adverse cardiac events, coronary artery bypass grafting, and stroke) when adjusted according to *Model 3* (data not shown).

Additional exploratory analyses revealed that fasting GIP concentration was border-line significantly associated with prevalent heart failure (OR[CI(95%)]=1.42[1.00-2.00]; p=0.051) in *Model 3*.

**ESM Table 2. Selected SNPs for construction of the instrumental variable for the reverse 2SMR analysis**

| SNP         | beta.outcome | se.outcome | pval.outcome | eaf.outcome | effect_allele<br>outcome | other_allele<br>outcome | outcome |
|-------------|--------------|------------|--------------|-------------|--------------------------|-------------------------|---------|
| rsa55730499 | -0.00886493  | 0.0294333  | 0.763295     | 0.0597085   | T                        | C                       | GIP     |
| rs55791371  | 0.0440409    | 0.0218724  | 0.0441579    | 0.0980407   | C                        | A                       | GIP     |
| rs7173743   | -0.00627492  | 0.0128649  | 0.625764     | 0.417684    | C                        | T                       | GIP     |
| rs28451064  | 0.0152185    | 0.0189161  | 0.421164     | 0.136615    | A                        | G                       | GIP     |
| rs6728861   | -0.0293762   | 0.0189901  | 0.122        | 0.128199    | A                        | G                       | GIP     |
| rs35158675  | -0.00157326  | 0.0146871  | 0.914703     | 0.734008    | A                        | G                       | GIP     |
| rs7137828   | -0.00883838  | 0.0129628  | 0.495406     | 0.524798    | T                        | C                       | GIP     |
| rs17514846  | -0.00149197  | 0.0125677  | 0.905511     | 0.462449    | A                        | C                       | GIP     |
| rs1870634   | -0.00745192  | 0.0135812  | 0.58326      | 0.657312    | G                        | T                       | GIP     |
| rs2107595   | -0.0197169   | 0.0170269  | 0.246973     | 0.166667    | A                        | G                       | GIP     |
| rs6841581   | -0.0108978   | 0.0191047  | 0.568436     | 0.128006    | A                        | G                       | GIP     |
| rs9515203   | 0.000189525  | 0.0139937  | 0.989195     | 0.284684    | C                        | T                       | GIP     |
| rs6743030   | -0.0257944   | 0.0128651  | 0.0450633    | 0.463212    | T                        | C                       | GIP     |
| rs6982502   | 0.0157328    | 0.0126531  | 0.213829     | 0.557529    | T                        | C                       | GIP     |
| rs1412444   | -0.00204114  | 0.0133372  | 0.878377     | 0.341472    | T                        | C                       | GIP     |
| rs3918226   | 0.00789545   | 0.0262827  | 0.763892     | 0.070408    | T                        | C                       | GIP     |
| rs9337951   | 0.00405385   | 0.0144867  | 0.779628     | 0.318294    | A                        | G                       | GIP     |
| rs185244    | -0.0201812   | 0.0166022  | 0.224252     | 0.170618    | T                        | C                       | GIP     |
| rs72743461  | 0.0253015    | 0.0146955  | 0.0852368    | 0.235459    | A                        | C                       | GIP     |
| rs170041    | -0.0161475   | 0.0140549  | 0.250704     | 0.28123     | T                        | C                       | GIP     |
| rs4803455   | 0.0182202    | 0.0126654  | 0.150385     | 0.505734    | A                        | C                       | GIP     |
| rs246600    | 0.0107431    | 0.0127215  | 0.398473     | 0.476538    | T                        | C                       | GIP     |
| rs7500448   | -0.0112977   | 0.0150599  | 0.453209     | 0.229905    | G                        | A                       | GIP     |
| rs8003602   | -0.00765551  | 0.0153995  | 0.61914      | 0.740993    | C                        | T                       | GIP     |
| rs62076439  | 0.0102806    | 0.0130386  | 0.430489     | 0.38581     | T                        | G                       | GIP     |
| rs3740390   | -0.00481986  | 0.0200011  | 0.809589     | 0.106894    | T                        | C                       | GIP     |
| rs2519093   | -0.0303402   | 0.0154323  | 0.049399     | 0.216098    | T                        | C                       | GIP     |

|             |             |           |           |           |   |   |     |
|-------------|-------------|-----------|-----------|-----------|---|---|-----|
| rs789294    | 0.00260883  | 0.017667  | 0.882617  | 0.816861  | G | C | GIP |
| rs7678555   | 0.00543061  | 0.0135105 | 0.68775   | 0.319377  | C | A | GIP |
| rs667920    | 0.00927443  | 0.0152556 | 0.543282  | 0.781724  | T | G | GIP |
| rs10857147  | 0.00159844  | 0.0144032 | 0.911642  | 0.308791  | T | A | GIP |
| rs4678145   | -0.0141828  | 0.0192362 | 0.461005  | 0.122324  | C | G | GIP |
| rs10841443  | -0.00152324 | 0.0144106 | 0.915826  | 0.719872  | G | C | GIP |
| rs17091891  | -0.0263767  | 0.020727  | 0.203278  | 0.103138  | C | T | GIP |
| rs6909752   | 0.0176169   | 0.0133382 | 0.186685  | 0.329023  | A | G | GIP |
| rs7251815   | -0.00905785 | 0.0157044 | 0.564141  | 0.210702  | T | G | GIP |
| rs112941079 | 0.00697332  | 0.0186001 | 0.707758  | 0.14283   | G | A | GIP |
| rs11601507  | 0.0140772   | 0.0238999 | 0.555907  | 0.0762116 | A | C | GIP |
| rs7199941   | 0.0211488   | 0.0127468 | 0.0972023 | 0.622231  | G | A | GIP |
| rs11170820  | 0.0012169   | 0.0328931 | 0.970491  | 0.0420386 | G | C | GIP |
| rs651821    | -0.0444902  | 0.0275415 | 0.106343  | 0.942841  | T | C | GIP |
| rs71566846  | -0.0111665  | 0.0244241 | 0.64757   | 0.0684425 | T | C | GIP |
| rs11107903  | 0.00777295  | 0.0245534 | 0.751592  | 0.0736325 | A | G | GIP |
| rs1892094   | 0.00580316  | 0.0124175 | 0.640296  | 0.536629  | T | C | GIP |
| rs472109    | 0.00182159  | 0.0129154 | 0.887849  | 0.606547  | C | G | GIP |
| rs944172    | 0.000901346 | 0.013899  | 0.948298  | 0.708102  | T | C | GIP |
| rs1317507   | -0.026611   | 0.0140731 | 0.0587434 | 0.725034  | C | A | GIP |
| rs6984210   | -0.00721432 | 0.0272192 | 0.790995  | 0.0587918 | G | C | GIP |
| rs17680741  | -0.00973492 | 0.0135611 | 0.472908  | 0.318053  | C | T | GIP |
| rs1050362   | 0.0149312   | 0.0131215 | 0.255257  | 0.374584  | A | C | GIP |
| rs34991912  | -0.0101069  | 0.0131526 | 0.442299  | 0.572902  | C | T | GIP |
| rs11204892  | -0.0198958  | 0.0171052 | 0.244874  | 0.836413  | G | A | GIP |
| rs7617773   | -0.0321014  | 0.0139753 | 0.0216943 | 0.706067  | T | C | GIP |
| rs606452    | 0.0200713   | 0.0185664 | 0.279769  | 0.86219   | C | A | GIP |
| rs1807214   | -0.0164823  | 0.0242328 | 0.49646   | 0.0746649 | C | A | GIP |
| rs9892152   | 0.00334208  | 0.0125905 | 0.790687  | 0.511065  | C | T | GIP |
| rs2820315   | 0.000803153 | 0.0135639 | 0.952787  | 0.311219  | T | C | GIP |
| rs4752700   | -0.0113521  | 0.012987  | 0.382136  | 0.432852  | G | A | GIP |
| rs12999907  | -0.0331591  | 0.0180242 | 0.0659221 | 0.148397  | G | A | GIP |

|             |             |           |           |           |   |   |     |
|-------------|-------------|-----------|-----------|-----------|---|---|-----|
| rs4754698   | 0.00847552  | 0.012876  | 0.510438  | 0.428458  | G | C | GIP |
| rs7998440   | -0.00371292 | 0.0131355 | 0.777457  | 0.367752  | A | G | GIP |
| rs1591805   | 0.000864777 | 0.0126842 | 0.945649  | 0.49104   | G | A | GIP |
| rs11099493  | 0.0341273   | 0.0136445 | 0.0124371 | 0.308361  | G | A | GIP |
| rs12500824  | -0.00872832 | 0.013432  | 0.515865  | 0.670195  | G | A | GIP |
| rs7145159   | -0.0186382  | 0.0125634 | 0.13805   | 0.460414  | C | T | GIP |
| rs4072980   | 0.0181507   | 0.0128958 | 0.159398  | 0.399926  | A | G | GIP |
| rs11080107  | -0.0227968  | 0.0125325 | 0.0690215 | 0.486877  | C | T | GIP |
| rs273909    | 0.0363837   | 0.0189685 | 0.0552027 | 0.130128  | G | A | GIP |
| rs11806316  | -0.00222344 | 0.0128884 | 0.863046  | 0.399926  | A | G | GIP |
| rs4613862   | -0.0115513  | 0.0126117 | 0.359794  | 0.488181  | C | A | GIP |
| rs12897     | -0.00414305 | 0.0131472 | 0.752689  | 0.643544  | A | G | GIP |
| rs885150    | -0.00754238 | 0.0139502 | 0.588784  | 0.301642  | C | T | GIP |
| rs11838267  | -0.0166777  | 0.0181997 | 0.359553  | 0.13781   | C | T | GIP |
| rs112635299 | 0.0146564   | 0.0428334 | 0.732248  | 0.0250542 | T | G | GIP |
| rs1476098   | -0.0294222  | 0.015576  | 0.059006  | 0.79379   | C | A | GIP |
| rs2493298   | -0.0184415  | 0.0180744 | 0.307675  | 0.14696   | A | C | GIP |
| rs4918072   | 0.0203975   | 0.0143455 | 0.155179  | 0.281774  | A | G | GIP |
| rs260020    | 0.00108413  | 0.0180312 | 0.95206   | 0.142053  | T | C | GIP |
| rs61848342  | -0.00307287 | 0.0134511 | 0.819315  | 0.361614  | C | T | GIP |
| rs9964304   | 0.0028986   | 0.0142572 | 0.83891   | 0.283559  | C | A | GIP |
| rs10237377  | 0.0131818   | 0.0131007 | 0.314415  | 0.36663   | T | G | GIP |
| rs12149545  | 1.30595e-05 | 0.013525  | 0.99923   | 0.318739  | A | G | GIP |
| rs10512861  | 0.00376962  | 0.0194293 | 0.846177  | 0.121176  | T | G | GIP |
| rs3827066   | -0.0151724  | 0.0184135 | 0.410024  | 0.132214  | T | C | GIP |
| rs2832227   | -0.0217493  | 0.0178471 | 0.223084  | 0.145796  | G | A | GIP |
| rs6997340   | 0.00717378  | 0.0141432 | 0.612039  | 0.721236  | C | T | GIP |
| rs7926712   | -0.0138723  | 0.0141457 | 0.326842  | 0.707976  | G | A | GIP |
| rs17080091  | -0.0353172  | 0.024937  | 0.156816  | 0.0662186 | T | C | GIP |
| rs17581137  | -0.00858428 | 0.0146254 | 0.55729   | 0.250573  | C | A | GIP |
| rs17081933  | -0.00752313 | 0.0160823 | 0.639972  | 0.195795  | A | T | GIP |
| rs2074164   | 0.00557679  | 0.016974  | 0.742522  | 0.169703  | C | G | GIP |

|            |             |           |            |          |   |   |     |
|------------|-------------|-----------|------------|----------|---|---|-----|
| rs663640   | 0.0141116   | 0.0157882 | 0.371506   | 0.213505 | T | C | GIP |
| rs6102343  | -0.0106145  | 0.0153695 | 0.489863   | 0.210722 | A | G | GIP |
| rs11613352 | 0.0244967   | 0.0141622 | 0.0837931  | 0.276367 | T | C | GIP |
| rs3775058  | 0.00261694  | 0.0150304 | 0.861792   | 0.773349 | T | A | GIP |
| rs582384   | -0.0062151  | 0.0131725 | 0.637091   | 0.565447 | A | C | GIP |
| rs7116641  | -0.00160164 | 0.0137661 | 0.907387   | 0.295967 | G | T | GIP |
| rs6700559  | -0.00443824 | 0.0128246 | 0.729316   | 0.466973 | T | C | GIP |
| rs7633770  | -0.00331521 | 0.0126697 | 0.793601   | 0.432482 | A | G | GIP |
| rs10267593 | 0.00952522  | 0.0159581 | 0.550631   | 0.200633 | A | G | GIP |
| rs4266144  | 0.0200182   | 0.0145099 | 0.167817   | 0.285126 | G | C | GIP |
| rs7797644  | -0.0143683  | 0.0149011 | 0.33501    | 0.769942 | C | T | GIP |
| rs36096196 | 0.00132836  | 0.0182795 | 0.942075   | 0.154722 | T | C | GIP |
| rs11677932 | -0.0122677  | 0.0136748 | 0.369741   | 0.331343 | A | G | GIP |
| rs7696431  | 0.0420777   | 0.0128119 | 0.00103554 | 0.466737 | G | T | GIP |
| rs11509880 | -0.00596986 | 0.013497  | 0.658301   | 0.312326 | A | G | GIP |
| rs76954792 | -0.00802781 | 0.0146208 | 0.583006   | 0.255261 | T | C | GIP |
| rs60154123 | -0.00954037 | 0.0180167 | 0.596482   | 0.149733 | T | C | GIP |
| rs1321309  | 0.00523504  | 0.0126288 | 0.678518   | 0.527007 | A | G | GIP |
| rs10093110 | 0.0107192   | 0.0129279 | 0.407094   | 0.410402 | A | G | GIP |
| rs2189839  | 0.00359731  | 0.0140635 | 0.798133   | 0.732591 | G | A | GIP |
| rs6494488  | -0.0030284  | 0.0173362 | 0.861339   | 0.842514 | A | G | GIP |
| rs975722   | 0.00594124  | 0.0128444 | 0.643722   | 0.393837 | G | A | GIP |
| rs3936511  | 0.00739936  | 0.017373  | 0.670206   | 0.165175 | G | A | GIP |
| rs2145598  | -0.0161768  | 0.0127119 | 0.203279   | 0.553187 | A | G | GIP |
| rs1334894  | -0.0370159  | 0.0208786 | 0.0763568  | 0.109453 | T | C | GIP |

**ESM Table 3.** Sensitivity analyses excluding subjects with prevalent diabetes.

|                                       | <b>PPP-Botnia<br/>HR (CI 95%)</b> | <b>p</b> | <b>MDC-CC<br/>HR (CI 95%)</b> | <b>p</b>             | <b>Meta-analysis<br/>HR (CI 95%)</b> | <b>p</b>             |
|---------------------------------------|-----------------------------------|----------|-------------------------------|----------------------|--------------------------------------|----------------------|
| <b>Fasting GIP</b>                    |                                   |          |                               |                      |                                      |                      |
| Total mortality <sup>1</sup>          | 1.24 (1.03-1.49)                  | 0.022    | 1.31 (1.18-1.46)              | 4.1x10 <sup>-7</sup> | 1.29 (1.18-1.42)                     | 1.4x10 <sup>-7</sup> |
| Total mortality <sup>2</sup>          | 1.24 (1.03-1.49)                  | 0.026    | 1.29 (1.16-1.45)              | 5x10 <sup>-6</sup>   | 1.28 (1.16-1.40)                     | 4.2x10 <sup>-7</sup> |
| Cardiovascular mortality <sup>1</sup> | 1.41 (1.03-1.93)                  | 0.033    | 1.31 (1.09-1.56)              | 0.004                | 1.33 (1.14-1.56)                     | 3.6x10 <sup>-4</sup> |
| Cardiovascular mortality <sup>2</sup> | 1.48 (1.07-2.06)                  | 0.019    | 1.26 (1.04-1.52)              | 0.020                | 1.31 (1.11-1.55)                     | 1.2x10 <sup>-3</sup> |
| Cardiovascular mortality <sup>3</sup> |                                   |          |                               |                      |                                      |                      |
| <b>Post-challenge GIP</b>             |                                   |          |                               |                      |                                      |                      |
| Total mortality <sup>1</sup>          | 0.96 (0.79-1.17)                  | 0.7      | 1.22 (1.07-1.40)              | 0.003                | 1.13 (1.02-1.26)                     | 0.025                |
| Total mortality <sup>2</sup>          | 0.99 (0.81-1.21)                  | 0.9      | 1.25 (1.09-1.43)              | 0.001                | 1.16 (1.04-1.30)                     | 9.8x10 <sup>-3</sup> |
| Cardiovascular mortality <sup>1</sup> | 0.93 (0.66-1.31)                  | 0.7      | 1.42 (1.12-1.79)              | 0.003                | 1.24 (1.02-1.51)                     | 0.032                |
| Cardiovascular mortality <sup>2</sup> | 0.98 (0.69-1.40)                  | 0.9      | 1.49 (1.18-1.88)              | 0.001                | 1.31 (1.08-1.59)                     | 6.4x10 <sup>-3</sup> |

<sup>1</sup>Model 1 is age and sex adjusted.

<sup>2</sup>Model 2 is adjusted for age, sex, BMI, SBP, fasting/post-challenge plasma glucose, fasting/post-challenge insulin, LDL and HDL.

Number of subjects included in analyses and (events) for fasting GIP as follows: total mortality in MDC n=3309 (328), and in PPP n=4273 (125), cardiovascular mortality in MDC n=3312 (108), and PPP n=4273 (40).



**ESM Table 4.** Sensitivity analyses in normoglycemic subjects in PPP-Botnia.

|                            | <b>OR (CI 95%)</b> | <b>p</b>             |
|----------------------------|--------------------|----------------------|
| <b>Fasting GIP</b>         |                    |                      |
| Incident CVD <sup>1</sup>  | 1.43(1.10-1.85)    | 0.008                |
| Incident CVD <sup>2</sup>  | 1.35(1.04-1.77)    | 0.027                |
| Prevalent CVD <sup>1</sup> | 1.42(1.17-1.73)    | 4.2x10 <sup>-4</sup> |
| Prevalent CVD <sup>2</sup> | 1.36(1.11-1.66)    | 0.003                |
| <b>Post-challenge GIP</b>  |                    |                      |
| Incident CVD <sup>1</sup>  | 1.43(1.06-1.94)    | 0.021                |
| Incident CVD <sup>2</sup>  | 1.42(1.047-1.94)   | 0.029                |
| Prevalent CVD <sup>1</sup> | 1.27(1.02-1.57)    | 0.035                |
| Prevalent CVD <sup>2</sup> | 1.33(1.06-1.67)    | 0.015                |

Associations of fasting GIP and post-challenge GIP, with prevalent and incident CVD at follow-up in normoglycemic subjects in PPP-Botnia cohort. <sup>1</sup>*Model 1* is age and sex adjusted. <sup>2</sup>*Model 2* is adjusted for age, sex, BMI, SBP, fasting/post-challenge plasma glucose, fasting/post-challenge insulin, LDL, HDL and smoking. CVD=cardiovascular disease. Total CVD includes both prevalent and incident cardiovascular disease. Number of cases was 62 for incident CVD and 130 for total prevalent CVD. The number of controls was 2151.

**ESM Table 5.** Sensitivity analyses excluding subjects with diabetes in MDC-CC.

|                           | <b>OR (CI 95%)</b> | <b>p</b>             |
|---------------------------|--------------------|----------------------|
| <b>Fasting GIP</b>        |                    |                      |
| Incident CVD <sup>1</sup> | 1.22(1.05-1.43)    | 0.010                |
| Incident CVD <sup>2</sup> | 1.22(1.01-1.47)    | 0.042                |
| Total CVD <sup>1</sup>    | 1.27(1.14-.42)     | 2.8x10 <sup>-5</sup> |
| Total CVD <sup>2</sup>    | 1.18(1.05-1.33)    | 0.006                |
| <b>Post-challenge GIP</b> |                    |                      |
| Incident CVD <sup>1</sup> | 1.33(1.13-1.56)    | 4.6x10 <sup>-4</sup> |
| Incident CVD <sup>2</sup> | 1.25(1.02-1.53)    | 0.031                |
| Total CVD <sup>1</sup>    | 1.24(1.11-1.39)    | 2.3x10 <sup>-4</sup> |
| Total CVD <sup>2</sup>    | 1.20(1.06-1.36)    | 0.004                |

Associations of fasting GIP and post-challenge GIP with prevalent and incident CVD at follow-up in subjects free from prevalent and incident diabetes in Malmö Diet and Cancer Cardiovascular Cohort. <sup>1</sup>*Model 1* is age and sex adjusted. <sup>2</sup>*Model 2* is adjusted for age, sex, BMI, SBP, fasting/post-challenge plasma glucose, fasting/post-challenge insulin, LDL, HDL and smoking. CVD=cardiovascular disease. Total CVD includes both prevalent and incident cardiovascular disease.

**ESM Table 6.** Associations of 1 SD fasting and post-challenge GLP-1 increment and outcomes in MDC-CC

|                                 | <b>Hazard ratios (CI 95%)</b> | <b>p</b> | <b>Hazard ratios (CI 95%)</b> | <b>p</b> |
|---------------------------------|-------------------------------|----------|-------------------------------|----------|
| <b>MODEL 1</b>                  | <b>FASTING GLP-1</b>          |          | <b>POST-CHALLENGE GLP-1</b>   |          |
| <b>Coronary events</b>          | 1.12 (0.94 – 1.35)            | 0.2      | 1.00 (0.82 – 1.24)            | 0.9      |
| <b>Angioplasty</b>              | 1.07 (0.85 – 1.35)            | 0.6      | 0.98 (0.75 – 1.28)            | 0.9      |
| <b>CABG</b>                     | 0.93 (0.77 – 1.12)            | 0.5      | 0.90 (0.72 – 1.13)            | 0.4      |
| <b>MACE</b>                     | 1.01 (0.86 – 1.19)            | 0.9      | 0.92 (0.76 – 1.11)            | 0.4      |
| <b>Heart failure</b>            | 1.81 (0.95 – 1.47)            | 0.1      | 1.04 (0.81 – 1.33)            | 0.8      |
| <b>Stroke</b>                   | 1.0 (0.86 – 1.18)             | 0.9      | 0.96 (0.81 – 1.15)            | 0.7      |
| <b>Total mortality</b>          | 1.13 (0.99 – 1.29)            | 0.1      | 1.05 (0.94 – 1.18)            | 0.4      |
| <b>Cardiovascular mortality</b> | 1.10 (0.92 – 1.32)            | 0.3      | 1.04 (0.85 – 1.28)            | 0.7      |
| <b>MODEL 2</b>                  | <b>FASTING GLP-1</b>          |          | <b>POST-CHALLENGE GLP-1</b>   |          |
| <b>Coronary events</b>          | 1.12 (0.92 – 1.35)            | 0.2      | 1.04 (0.84 – 1.29)            | 0.7      |
| <b>Angioplasty</b>              | 1.06 (0.83 – 1.36)            | 0.6      | 0.94 (0.71 – 1.25)            | 0.7      |
| <b>CABG</b>                     | 0.90 (0.74 – 1.10)            | 0.3      | 0.90 (0.71 – 1.14)            | 0.4      |
| <b>MACE</b>                     | 0.97 (0.82 – 1.14)            | 0.7      | 0.92 (0.76 – 1.13)            | 0.4      |
| <b>Heart failure</b>            | 0.99 (0.81 – 1.22)            | 0.9      | 1.03 (0.79 – 1.35)            | 0.8      |
| <b>Stroke</b>                   | 1.03 (0.87 – 1.21)            | 0.8      | 0.96 (0.80 – 1.16)            | 0.7      |
| <b>Total mortality</b>          | 1.11 (0.99 – 1.24)            | 0.1      | 1.03 (0.91 – 1.16)            | 0.7      |
| <b>Cardiovascular mortality</b> | 1.08 (0.90 – 1.29)            | 0.4      | 1.06 (0.86 – 1.30)            | 0.6      |

GLP-1=glucagon like peptide 1; CABG=coronary artery bypass surgery; MACE=major adverse coronary event. <sup>1</sup>Model 1 is age and sex adjusted. <sup>2</sup>Model 2 is adjusted for age, sex, BMI, SBP, fasting/post-challenge plasma glucose, fasting/post-challenge insulin, LDL, HDL and smoking.

**ESM Table 7. Complete data on rs1800437 used as instrumental variable in the 2SMR analysis from GIP to CAD/MI using CARDIoGRAMplusC4D and UK Biobank datasets.**

|                        | <b>CARDIoGRAMplusC4D<br/>(CAD)</b> | <b>UK Biobank<br/>(CAD)</b> | <b>CARDIoGRAMplusC4D<br/>(MI)</b> |
|------------------------|------------------------------------|-----------------------------|-----------------------------------|
| SNP                    | rs1800437                          | rs1800437                   | rs1800437                         |
| effect_allele.exposure | C                                  | C                           | C                                 |
| other_allele.exposure  | G                                  | G                           | G                                 |
| effect_allele.outcome  | C                                  | C                           | C                                 |
| other_allele.outcome   | G                                  | G                           | G                                 |
| beta.exposure          | -0.076                             | -0.076                      | -0.076                            |
| beta.outcome           | -0.038                             | -0.032                      | -0.035                            |
| eaf.exposure           | 0.256                              | 0.256                       | 0.256                             |
| eaf.outcome            | 0.195                              | 0.195                       | 0.187                             |
| se.outcome             | 0.012                              | 0.008                       | 0.014                             |
| samplesize.outcome     | 184305                             | 296525                      | 171875                            |
| ncase.outcome          | 60801                              | 34541                       | 43676                             |
| ncontrol.outcome       | 123504                             | 261984                      | 128199                            |
| pval.outcome           | 0.002                              | 0.0002                      | 0.013                             |
| units.outcome          | log odds                           | log odds                    | log odds                          |
| outcome                | CAD                                | CAD                         | MI                                |
| consortium.outcome     | CARDIoGRAMplusC4D                  | UK Biobank                  | CARDIoGRAMplusC4D                 |
| year.outcome           | 2015                               | 2018                        | 2015                              |
| pmid.outcome           | 26343387                           | 29212778                    | 26343387                          |
| category.outcome       | Disease                            | Disease                     | Disease                           |
| subcategory.outcome    | Cardiovascular                     | Cardiovascular              | Cardiovascular                    |
| originalname.outcome   | Coronary heart disease             | Coronary heart disease      | Myocardial infarction             |

|                                             |                                    |                                    |                                    |
|---------------------------------------------|------------------------------------|------------------------------------|------------------------------------|
| gene.exposure                               | GIPR                               | GIPR                               | GIPR                               |
| se.exposure                                 | 0.010                              | 0.010                              | 0.010                              |
| pval.exposure                               | 4,00E-15                           | 4,00E-15                           | 4,00E-15                           |
| units.exposure                              | unit decrease                      | unit decrease                      | unit decrease                      |
| exposure                                    | Fasting GIP                        | Fasting GIP                        | Fasting GIP                        |
| Initial_sample_discription for rs1800347    | 3,344 Swedish ancestry individuals | 3,344 Swedish ancestry individuals | 3,344 Swedish ancestry individuals |
| Replication_smple_discription for rs1800347 | 4,905 Finnish ancestry individuals | 4,905 Finnish ancestry individuals | 4,905 Finnish ancestry individuals |

**ESM Table 8. Complete data for the reverse 2SMR analyses**

| <b>Method</b>          | <b>B</b> | <b>SE</b> | <b>p-value</b> |
|------------------------|----------|-----------|----------------|
| <b>MR Egger</b>        | -0.039   | 0.074     | 0.595          |
| <b>Weighted median</b> | -0.028   | 0.051     | 0.583          |
| <b>IVW</b>             | -0.042   | 0.029     | 0.148          |
| <b>Simple mode</b>     | -0.026   | 0.106     | 0.804          |

Complete data for reverse 2SMR analysis. 114 SNP were analyzed with GIP as outcome and CAD as exposure.

**ESM Table 9. Single SNP reverse MR analysis from CAD to GIP.**

| <b>exposure</b> | <b>outcome</b> | <b>SNP</b>  | <b>b</b> | <b>se</b> | <b>p</b> |
|-----------------|----------------|-------------|----------|-----------|----------|
| CAD             | GIP            | rs10093110  | -0.335   | 0.404     | 0.407    |
| CAD             | GIP            | rs10237377  | -0.388   | 0.385     | 0.314    |
| CAD             | GIP            | rs10267593  | -0.265   | 0.443     | 0.551    |
| CAD             | GIP            | rs1050362   | 0.427    | 0.375     | 0.255    |
| CAD             | GIP            | rs10512861  | -0.088   | 0.452     | 0.846    |
| CAD             | GIP            | rs10841443  | -0.033   | 0.313     | 0.916    |
| CAD             | GIP            | rs10857147  | 0.033    | 0.294     | 0.912    |
| CAD             | GIP            | rs11080107  | -0.633   | 0.348     | 0.069    |
| CAD             | GIP            | rs11099493  | -0.875   | 0.350     | 0.012    |
| CAD             | GIP            | rs11107903  | -0.104   | 0.327     | 0.752    |
| CAD             | GIP            | rs11170820  | 0.015    | 0.396     | 0.970    |
| CAD             | GIP            | rs11204892  | -0.406   | 0.349     | 0.245    |
| CAD             | GIP            | rs112635299 | -0.108   | 0.315     | 0.732    |
| CAD             | GIP            | rs112941079 | -0.112   | 0.300     | 0.708    |
| CAD             | GIP            | rs11509880  | -0.181   | 0.409     | 0.658    |
| CAD             | GIP            | rs11601507  | 0.181    | 0.306     | 0.556    |
| CAD             | GIP            | rs11613352  | -0.681   | 0.393     | 0.084    |
| CAD             | GIP            | rs11677932  | 0.361    | 0.402     | 0.370    |
| CAD             | GIP            | rs11806316  | 0.065    | 0.379     | 0.863    |
| CAD             | GIP            | rs11838267  | 0.327    | 0.357     | 0.359    |
| CAD             | GIP            | rs12149545  | -0.001   | 0.366     | 0.999    |
| CAD             | GIP            | rs12500824  | 0.257    | 0.395     | 0.516    |
| CAD             | GIP            | rs12897     | 0.115    | 0.365     | 0.753    |
| CAD             | GIP            | rs12999907  | 0.691    | 0.376     | 0.066    |
| CAD             | GIP            | rs1317507   | 0.665    | 0.352     | 0.059    |
| CAD             | GIP            | rs1321309   | 0.187    | 0.451     | 0.678    |
| CAD             | GIP            | rs1334894   | 0.771    | 0.435     | 0.076    |
| CAD             | GIP            | rs1412444   | -0.036   | 0.238     | 0.878    |
| CAD             | GIP            | rs1476098   | 0.669    | 0.354     | 0.059    |
| CAD             | GIP            | rs1591805   | -0.023   | 0.343     | 0.946    |
| CAD             | GIP            | rs170041    | 0.344    | 0.299     | 0.251    |
| CAD             | GIP            | rs17080091  | 0.654    | 0.462     | 0.157    |
| CAD             | GIP            | rs17081933  | -0.188   | 0.402     | 0.640    |
| CAD             | GIP            | rs17091891  | 0.447    | 0.351     | 0.203    |
| CAD             | GIP            | rs17514846  | -0.027   | 0.224     | 0.906    |
| CAD             | GIP            | rs17581137  | 0.232    | 0.395     | 0.557    |
| CAD             | GIP            | rs17680741  | 0.232    | 0.323     | 0.473    |
| CAD             | GIP            | rs1807214   | 0.258    | 0.379     | 0.496    |
| CAD             | GIP            | rs185244    | -0.315   | 0.259     | 0.224    |

|     |     |            |        |       |       |
|-----|-----|------------|--------|-------|-------|
| CAD | GIP | rs1870634  | -0.124 | 0.226 | 0.583 |
| CAD | GIP | rs1892094  | -0.161 | 0.345 | 0.640 |
| CAD | GIP | rs2074164  | 0.133  | 0.404 | 0.742 |
| CAD | GIP | rs2107595  | -0.263 | 0.227 | 0.247 |
| CAD | GIP | rs2145598  | 0.578  | 0.454 | 0.203 |
| CAD | GIP | rs2189839  | -0.103 | 0.402 | 0.798 |
| CAD | GIP | rs246600   | 0.250  | 0.296 | 0.398 |
| CAD | GIP | rs2493298  | -0.362 | 0.354 | 0.308 |
| CAD | GIP | rs2519093  | -0.552 | 0.281 | 0.049 |
| CAD | GIP | rs260020   | 0.021  | 0.347 | 0.952 |
| CAD | GIP | rs273909   | 0.743  | 0.387 | 0.055 |
| CAD | GIP | rs2820315  | 0.022  | 0.377 | 0.953 |
| CAD | GIP | rs2832227  | -0.558 | 0.458 | 0.223 |
| CAD | GIP | rs28451064 | 0.141  | 0.175 | 0.421 |
| CAD | GIP | rs34991912 | 0.266  | 0.346 | 0.442 |
| CAD | GIP | rs35158675 | -0.022 | 0.210 | 0.915 |
| CAD | GIP | rs36096196 | 0.028  | 0.389 | 0.942 |
| CAD | GIP | rs3740390  | 0.073  | 0.303 | 0.810 |
| CAD | GIP | rs3775058  | -0.067 | 0.385 | 0.862 |
| CAD | GIP | rs3827066  | -0.361 | 0.438 | 0.410 |
| CAD | GIP | rs3918226  | 0.074  | 0.246 | 0.764 |
| CAD | GIP | rs3936511  | 0.200  | 0.470 | 0.670 |
| CAD | GIP | rs4072980  | -0.550 | 0.391 | 0.159 |
| CAD | GIP | rs4266144  | 0.572  | 0.415 | 0.168 |
| CAD | GIP | rs4613862  | 0.361  | 0.394 | 0.360 |
| CAD | GIP | rs4678145  | -0.221 | 0.301 | 0.461 |
| CAD | GIP | rs4752700  | -0.344 | 0.394 | 0.382 |
| CAD | GIP | rs4803455  | -0.380 | 0.264 | 0.150 |
| CAD | GIP | rs4918072  | 0.523  | 0.368 | 0.155 |
| CAD | GIP | rs55730499 | -0.028 | 0.094 | 0.763 |
| CAD | GIP | rs55791371 | -0.380 | 0.189 | 0.044 |
| CAD | GIP | rs582384   | -0.188 | 0.399 | 0.637 |
| CAD | GIP | rs60154123 | -0.217 | 0.409 | 0.596 |
| CAD | GIP | rs606452   | 0.427  | 0.395 | 0.280 |
| CAD | GIP | rs6102343  | -0.287 | 0.415 | 0.490 |
| CAD | GIP | rs61848342 | -0.085 | 0.374 | 0.819 |
| CAD | GIP | rs62076439 | 0.214  | 0.272 | 0.430 |
| CAD | GIP | rs6494488  | -0.080 | 0.456 | 0.861 |
| CAD | GIP | rs651821   | 0.645  | 0.399 | 0.106 |
| CAD | GIP | rs663640   | 0.371  | 0.415 | 0.371 |
| CAD | GIP | rs667920   | 0.189  | 0.311 | 0.543 |
| CAD | GIP | rs6700559  | 0.159  | 0.458 | 0.729 |
| CAD | GIP | rs6728861  | -0.280 | 0.181 | 0.122 |
| CAD | GIP | rs6743030  | -0.453 | 0.226 | 0.045 |
| CAD | GIP | rs6841581  | -0.145 | 0.255 | 0.568 |



|     |     |                |        |       |       |
|-----|-----|----------------|--------|-------|-------|
| CAD | GIP | rs6909752      | 0.400  | 0.303 | 0.187 |
| CAD | GIP | rs6982502      | -0.315 | 0.253 | 0.214 |
| CAD | GIP | rs6984210      | -0.093 | 0.349 | 0.791 |
| CAD | GIP | rs6997340      | -0.217 | 0.429 | 0.612 |
| CAD | GIP | rs7116641      | -0.052 | 0.444 | 0.907 |
| CAD | GIP | rs7137828      | 0.138  | 0.203 | 0.495 |
| CAD | GIP | rs7145159      | -0.582 | 0.393 | 0.138 |
| CAD | GIP | rs71566846     | -0.135 | 0.294 | 0.648 |
| CAD | GIP | rs7173743      | 0.098  | 0.201 | 0.626 |
| CAD | GIP | rs7199941      | -0.572 | 0.345 | 0.097 |
| CAD | GIP | rs7251815      | -0.178 | 0.308 | 0.564 |
| CAD | GIP | rs72743461     | -0.436 | 0.253 | 0.085 |
| CAD | GIP | rs7500448      | 0.202  | 0.269 | 0.453 |
| CAD | GIP | rs7617773      | -0.892 | 0.388 | 0.022 |
| CAD | GIP | rs7633770      | -0.111 | 0.422 | 0.794 |
| CAD | GIP | rs7678555      | 0.111  | 0.276 | 0.688 |
| CAD | GIP | rs76954792     | -0.206 | 0.375 | 0.583 |
| CAD | GIP | rs7696431      | -1.357 | 0.413 | 0.001 |
| CAD | GIP | rs7797644      | -0.368 | 0.382 | 0.335 |
| CAD | GIP | rs789294       | 0.041  | 0.276 | 0.883 |
| CAD | GIP | rs7926712      | -0.396 | 0.404 | 0.327 |
| CAD | GIP | rs7998440      | 0.098  | 0.346 | 0.777 |
| CAD | GIP | rs8003602      | -0.142 | 0.285 | 0.619 |
| CAD | GIP | rs885150       | -0.210 | 0.388 | 0.589 |
| CAD | GIP | rs9337951      | 0.075  | 0.268 | 0.780 |
| CAD | GIP | rs944172       | -0.023 | 0.347 | 0.948 |
| CAD | GIP | rs9515203      | -0.003 | 0.233 | 0.989 |
| CAD | GIP | rs975722       | 0.212  | 0.459 | 0.644 |
| CAD | GIP | rs9892152      | 0.101  | 0.382 | 0.791 |
| CAD | GIP | rs9964304      | 0.076  | 0.375 | 0.839 |
| CAD | GIP | All - IVW      | -0.042 | 0.029 | 0.148 |
| CAD | GIP | All - MR Egger | -0.039 | 0.074 | 0.595 |

**ESM Table 10. Associations of rs1800437 and phenotypes in UK biobank**

|             |                            |           |       |        |           |   |   |            |            |            |
|-------------|----------------------------|-----------|-------|--------|-----------|---|---|------------|------------|------------|
| UKB-a:283   | Arm fat mass (right)       | Neale Lab | M & F | 331226 | Neale Lab | C | G | -0,0299312 | 2,1241E-23 | 0,00300278 |
| UKB-a:249   | Weight                     | Neale Lab | M & F | 336227 | Neale Lab | C | G | -0,0266963 | 2,1396E-23 | 0,00267845 |
| UKB-b:16446 | Basal metabolic rate       | MRC-IEU   | M & F | 454874 | MRC-IEU   | G | C | 0,0161212  | 1,6E-22    | 0,001651   |
| UKB-a:291   | Trunk fat mass             | Neale Lab | M & F | 331093 | Neale Lab | C | G | -0,0297282 | 5,7716E-22 | 0,00308569 |
| UKB-a:382   | Waist circumference        | Neale Lab | M & F | 336639 | Neale Lab | C | G | -0,0259408 | 1,2431E-21 | 0,00271488 |
| UKB-a:264   | Body fat percentage        | Neale Lab | M & F | 331117 | Neale Lab | C | G | -0,0224267 | 1,3811E-21 | 0,00234979 |
| UKB-b:9093  | Arm predicted mass (left)  | MRC-IEU   | M & F | 454655 | MRC-IEU   | G | C | 0,0149536  | 4,1E-21    | 0,00158584 |
| UKB-b:19925 | Arm fat-free mass (left)   | MRC-IEU   | M & F | 454672 | MRC-IEU   | G | C | 0,0149178  | 7,2E-21    | 0,00159207 |
| UKB-b:16099 | Leg fat-free mass (left)   | MRC-IEU   | M & F | 454805 | MRC-IEU   | G | C | 0,0152882  | 1,6E-20    | 0,00164597 |
| UKB-b:17271 | Leg predicted mass (left)  | MRC-IEU   | M & F | 454799 | MRC-IEU   | G | C | 0,0151009  | 2,6E-20    | 0,00163526 |
| UKB-a:286   | Arm fat percentage (left)  | Neale Lab | M & F | 331198 | Neale Lab | C | G | -0,0211072 | 9,2237E-20 | 0,0023199  |
| UKB-a:282   | Arm fat percentage (right) | Neale Lab | M & F | 331249 | Neale Lab | C | G | -0,0210604 | 1,6283E-19 | 0,00233064 |
| UKB-b:19520 | Arm fat-free mass (right)  | MRC-IEU   | M & F | 454753 | MRC-IEU   | G | C | 0,0140994  | 1,7E-19    | 0,0015615  |
| UKB-b:16698 | Arm predicted mass (right) | MRC-IEU   | M & F | 454746 | MRC-IEU   | G | C | 0,0139659  | 2,9E-19    | 0,00155624 |
| UKB-a:290   | Trunk fat percentage       | Neale Lab | M & F | 331113 | Neale Lab | C | G | -0,0243474 | 5,4963E-18 | 0,00281698 |
| UKB-b:14310 | Leg predicted mass (right) | MRC-IEU   | M & F | 454834 | MRC-IEU   | G | C | 0,0140832  | 6,9E-18    | 0,00163444 |
| UKB-b:12828 | Leg fat-free mass (right)  | MRC-IEU   | M & F | 454835 | MRC-IEU   | G | C | 0,0141451  | 8,1E-18    | 0,00164503 |
| UKB-b:14540 | Whole body water mass      | MRC-IEU   | M & F | 454888 | MRC-IEU   | G | C | 0,0133147  | 2,5E-17    | 0,00157247 |
| UKB-b:19921 | Impedance of whole body    | MRC-IEU   | M & F | 454840 | MRC-IEU   | G | C | -0,0161046 | 3,8E-17    | 0,00191302 |
| UKB-b:13354 | Whole body fat-free mass   | MRC-IEU   | M & F | 454850 | MRC-IEU   | G | C | 0,0131307  | 6,1E-17    | 0,00156989 |
| UKB-b:7859  | Impedance of arm (right)   | MRC-IEU   | M & F | 454826 | MRC-IEU   | G | C | -0,0144108 | 4,8E-16    | 0,00177561 |
| UKB-b:19379 | Impedance of arm (left)    | MRC-IEU   | M & F | 454850 | MRC-IEU   | G | C | -0,014142  | 2,1E-15    | 0,00178212 |
| UKB-a:388   | Hip circumference          | Neale Lab | M & F | 336601 | Neale Lab | C | G | -0,0240713 | 2,2065E-15 | 0,00303565 |
| UKB-a:268   | Basal metabolic rate       | Neale Lab | M & F | 331307 | Neale Lab | C | G | -0,0149389 | 1,9724E-13 | 0,00203223 |

|             |                                 |           |       |        |           |   |   |            |            |            |
|-------------|---------------------------------|-----------|-------|--------|-----------|---|---|------------|------------|------------|
| UKB-a:335   | Sodium in urine                 | Neale Lab | M & F | 326831 | Neale Lab | C | G | -0,0216244 | 4,4178E-13 | 0,00298581 |
| UKB-a:289   | Arm predicted mass (left)       | Neale Lab | M & F | 331146 | Neale Lab | C | G | -0,0139458 | 6,7995E-13 | 0,00194131 |
| UKB-b:14068 | Impedance of leg (left)         | MRC-IEU   | M & F | 454857 | MRC-IEU   | G | C | -0,0163908 | 9,3E-13    | 0,00229525 |
| UKB-a:285   | Arm predicted mass (right)      | Neale Lab | M & F | 331216 | Neale Lab | C | G | -0,0135412 | 1,1153E-12 | 0,00190299 |
| UKB-a:288   | Arm fat-free mass (left)        | Neale Lab | M & F | 331159 | Neale Lab | C | G | -0,0138316 | 1,2664E-12 | 0,00194861 |
| UKB-b:17409 | Trunk fat-free mass             | MRC-IEU   | M & F | 454508 | MRC-IEU   | G | C | 0,0110144  | 1,9E-12    | 0,00156358 |
| UKB-b:9685  | Trunk predicted mass            | MRC-IEU   | M & F | 454463 | MRC-IEU   | G | C | 0,0109187  | 2,5E-12    | 0,00155854 |
| UKB-a:284   | Arm fat-free mass (right)       | Neale Lab | M & F | 331221 | Neale Lab | C | G | -0,0132444 | 4,0682E-12 | 0,00190978 |
| UKB-b:7376  | Impedance of leg (right)        | MRC-IEU   | M & F | 454863 | MRC-IEU   | G | C | -0,0156036 | 7,1E-12    | 0,0022759  |
| UKB-a:280   | Leg fat-free mass (left)        | Neale Lab | M & F | 331258 | Neale Lab | C | G | -0,0137622 | 9,1785E-12 | 0,00201819 |
| UKB-a:281   | Leg predicted mass (left)       | Neale Lab | M & F | 331253 | Neale Lab | C | G | -0,0134415 | 2,0074E-11 | 0,00200449 |
| UKB-b:4650  | Comparative body size at age 10 | MRC-IEU   | M & F | 454718 | MRC-IEU   | G | C | 0,0117368  | 3,1E-11    | 0,00176749 |
| UKB-a:277   | Leg predicted mass (right)      | Neale Lab | M & F | 331285 | Neale Lab | C | G | -0,0126461 | 2,8028E-10 | 0,00200429 |
| UKB-a:276   | Leg fat-free mass (right)       | Neale Lab | M & F | 331285 | Neale Lab | C | G | -0,0126706 | 3,3778E-10 | 0,00201744 |
| UKB-a:267   | Whole body water mass           | Neale Lab | M & F | 331315 | Neale Lab | C | G | -0,0120419 | 5,516E-10  | 0,00194104 |
| UKB-a:266   | Whole body fat-free mass        | Neale Lab | M & F | 331291 | Neale Lab | C | G | -0,0117673 | 1,2693E-09 | 0,00193815 |
| UKB-a:269   | Impedance of whole body         | Neale Lab | M & F | 331284 | Neale Lab | C | G | 0,014152   | 1,4038E-09 | 0,00233716 |
| UKB-a:273   | Impedance of arm (left)         | Neale Lab | M & F | 331292 | Neale Lab | C | G | 0,0130194  | 1,8022E-09 | 0,00216454 |
| UKB-a:333   | Creatinine (enzymatic) in urine | Neale Lab | M & F | 327525 | Neale Lab | C | G | -0,017439  | 1,9183E-09 | 0,0029042  |
| UKB-a:272   | Impedance of arm (right)        | Neale Lab | M & F | 331279 | Neale Lab | C | G | 0,0128347  | 2,61E-09   | 0,00215543 |
| UKB-a:34    | Comparative body size at age 10 | Neale Lab | M & F | 331693 | Neale Lab | C | G | -0,0121372 | 7,3506E-09 | 0,00209883 |
| UKB-b:3881  | Fresh fruit intake              | MRC-IEU   | M & F | 446462 | MRC-IEU   | G | C | -0,0088917 | 8E-09      | 0,0015413  |
| UKB-b:4080  | Ankle spacing width             | MRC-IEU   | M & F | 265753 | MRC-IEU   | G | C | 0,0159358  | 2,4E-08    | 0,0028546  |

**ESM Table 11. Associations of rs1800437 and phenotypes in GWAS Atlas**

| atlas ID | PMID       | Year | Domain    | Trait                                         | P-value   | N      | EA | NEA |
|----------|------------|------|-----------|-----------------------------------------------|-----------|--------|----|-----|
| 143      | 25673413   | 2015 | Metabolic | Body Mass Index                               | 1.726e-17 | 234069 | G  | C   |
| 144      | 25673413   | 2015 | Metabolic | Body Mass Index (male)                        | 1.418e-11 | 104666 | G  | C   |
| 145      | 25673413   | 2015 | Metabolic | Body Mass Index (female)                      | 4.34e-10  | 132115 | G  | C   |
| 146      | 25673413   | 2015 | Metabolic | Body Mass Index                               | 3.038e-18 | 236231 | G  | C   |
| 167      | 25673412   | 2015 | Metabolic | Waist circumference                           | 8.9e-14   | 232101 | G  | C   |
| 168      | 25673412   | 2015 | Metabolic | Waist circumference                           | 1.3e-13   | 244441 | G  | C   |
| 169      | 25673412   | 2015 | Metabolic | Waist circumference (male)                    | 1.8e-8    | 104406 | G  | C   |
| 170      | 25673412   | 2015 | Metabolic | Waist circumference (male)                    | 3.6e-8    | 110004 | G  | C   |
| 179      | 25673412   | 2015 | Metabolic | Waist-hip ratio                               | 1.6e-8    | 212248 | G  | C   |
| 180      | 25673412   | 2015 | Metabolic | Waist-hip ratio                               | 4.5e-8    | 226643 | G  | C   |
| 3185     | This study | 2017 | Metabolic | Waist circumference                           | 1.927e-26 | 385932 | G  | C   |
| 3186     | This study | 2017 | Metabolic | Hip circumference                             | 6.187e-22 | 385887 | G  | C   |
| 3270     | This study | 2017 | Metabolic | Comparative body size at age 10               | 5.385e-10 | 379749 | G  | C   |
| 3435     | This study | 2017 | Metabolic | Body mass index                               | 9.303e-35 | 385336 | G  | C   |
| 3436     | This study | 2017 | Metabolic | Weight                                        | 7.841e-30 | 385473 | G  | C   |
| 3440     | This study | 2017 | Metabolic | Impedance measures - Weight                   | 1.37e-27  | 379840 | G  | C   |
| 3441     | This study | 2017 | Metabolic | Impedance measures - Body fat percentage      | 3.634e-25 | 379615 | G  | C   |
| 3442     | This study | 2017 | Metabolic | Impedance measures - Whole body fat mass      | 3.128e-31 | 379203 | G  | C   |
| 3443     | This study | 2017 | Metabolic | Impedance measures - Whole body fat-free mass | 2.299e-13 | 379804 | G  | C   |
| 3444     | This study | 2017 | Metabolic | Impedance measures - Whole body water mass    | 1.149e-13 | 379835 | G  | C   |

|      |            |      |           |                                                 |           |        |   |   |
|------|------------|------|-----------|-------------------------------------------------|-----------|--------|---|---|
| 3445 | This study | 2017 | Metabolic | Impedance measures - Body mass index (BMI)      | 2.965e-32 | 379831 | G | C |
| 3446 | This study | 2017 | Metabolic | Impedance measures - Basal metabolic rate       | 2.072e-17 | 379821 | G | C |
| 3447 | This study | 2017 | Metabolic | Impedance measures - Impedance of whole body    | 2.048e-10 | 379792 | C | G |
| 3450 | This study | 2017 | Metabolic | Impedance measures - Impedance of arm (right)   | 5.559e-11 | 379786 | C | G |
| 3451 | This study | 2017 | Metabolic | Impedance measures - Impedance of arm (left)    | 3.951e-11 | 379803 | C | G |
| 3452 | This study | 2017 | Metabolic | Impedance measures - Leg fat percentage (right) | 2.055e-26 | 379806 | G | C |
| 3453 | This study | 2017 | Metabolic | Impedance measures - Leg fat mass (right)       | 1.526e-30 | 379802 | G | C |
| 3454 | This study | 2017 | Metabolic | Impedance measures - Leg fat-free mass (right)  | 1.743e-14 | 379793 | G | C |
| 3455 | This study | 2017 | Metabolic | Impedance measures - Leg predicted mass (right) | 1.384e-14 | 379793 | G | C |
| 3456 | This study | 2017 | Metabolic | Impedance measures - Leg fat percentage (left)  | 2.28e-27  | 379786 | G | C |
| 3457 | This study | 2017 | Metabolic | Impedance measures - Leg fat mass (left)        | 2.897e-31 | 379783 | G | C |
| 3458 | This study | 2017 | Metabolic | Impedance measures - Leg fat-free mass (left)   | 5.428e-16 | 379766 | G | C |
| 3459 | This study | 2017 | Metabolic | Impedance measures - Leg predicted mass (left)  | 7.337e-16 | 379761 | G | C |
| 3460 | This study | 2017 | Metabolic | Impedance measures - Arm fat percentage (right) | 4.354e-22 | 379752 | G | C |
| 3461 | This study | 2017 | Metabolic | Impedance measures - Arm fat mass (right)       | 1.225e-29 | 379725 | G | C |
| 3462 | This study | 2017 | Metabolic | Impedance measures - Arm fat-free mass (right)  | 2.296e-16 | 379723 | G | C |
| 3463 | This study | 2017 | Metabolic | Impedance measures - Arm predicted mass (right) | 2.797e-16 | 379716 | G | C |
| 3464 | This study | 2017 | Metabolic | Impedance measures - Arm fat percentage (left)  | 1.583e-22 | 379699 | G | C |
| 3465 | This study | 2017 | Metabolic | Impedance measures - Arm fat mass (left)        | 6.143e-29 | 379663 | G | C |
| 3466 | This study | 2017 | Metabolic | Impedance measures - Arm fat-free mass (left)   | 3.914e-17 | 379653 | G | C |

|      |            |      |           |                                                |           |        |   |   |
|------|------------|------|-----------|------------------------------------------------|-----------|--------|---|---|
| 3467 | This study | 2017 | Metabolic | Impedance measures - Arm predicted mass (left) | 1.374e-17 | 379638 | G | C |
| 3468 | This study | 2017 | Metabolic | Impedance measures - Trunk fat percentage      | 1.626e-20 | 379600 | G | C |
| 3469 | This study | 2017 | Metabolic | Impedance measures - Trunk fat mass            | 1.64e-27  | 379578 | G | C |
| 3470 | This study | 2017 | Metabolic | Impedance measures - Trunk fat-free mass       | 3.972e-10 | 379507 | G | C |
| 3471 | This study | 2017 | Metabolic | Impedance measures - Trunk predicted mass      | 5.611e-10 | 379469 | G | C |
| 3939 | 28892062   | 2017 | Metabolic | Body Mass Index                                | 3.98e-9   | 158284 | C | G |
| 4044 | 30124842   | 2018 | Metabolic | Body Mass Index                                | 2.4e-43   | 681275 | G | C |
| 4074 | 30239722   | 2018 | Metabolic | Body Mass Index                                | 3.321e-59 | 806834 | G | C |
| 4075 | 30239722   | 2018 | Metabolic | Body Mass Index (male)                         | 1.731e-33 | 374756 | G | C |
| 4076 | 30239722   | 2018 | Metabolic | Body Mass Index (female)                       | 2.347e-30 | 434794 | G | C |
| 4077 | 30239722   | 2018 | Metabolic | Waist-hip ratio                                | 6.225e-22 | 697734 | G | C |
| 4078 | 30239722   | 2018 | Metabolic | Waist-hip ratio (male)                         | 3.779e-15 | 316772 | G | C |
| 4079 | 30239722   | 2018 | Metabolic | Waist-hip ratio (female)                       | 5.09e-10  | 381152 | G | C |
| 4086 | 30297969   | 2018 | Endocrine | Type 2 Diabetes (adjusted for BMI)             | 2.7e-14   | 898130 | C | G |
| 4108 | 29403010   | 2018 | Metabolic | Blood urea nitrogen                            | 1.838e-10 | 139818 | G | C |

**ESM Fig. 1.** Schematic description of the population included in PPP-Botnia study

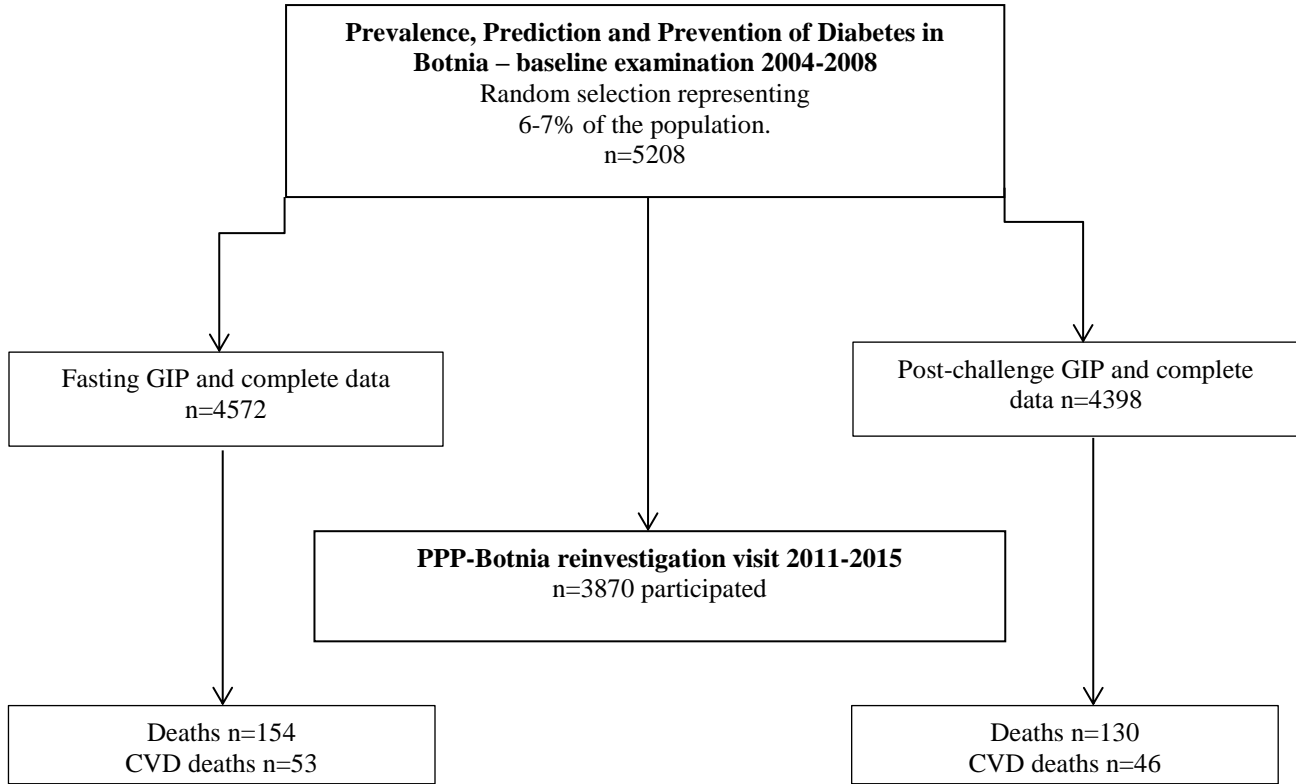

**ESM Fig. 2.** Schematic description of the population included in Malmö Diet and Cancer Study

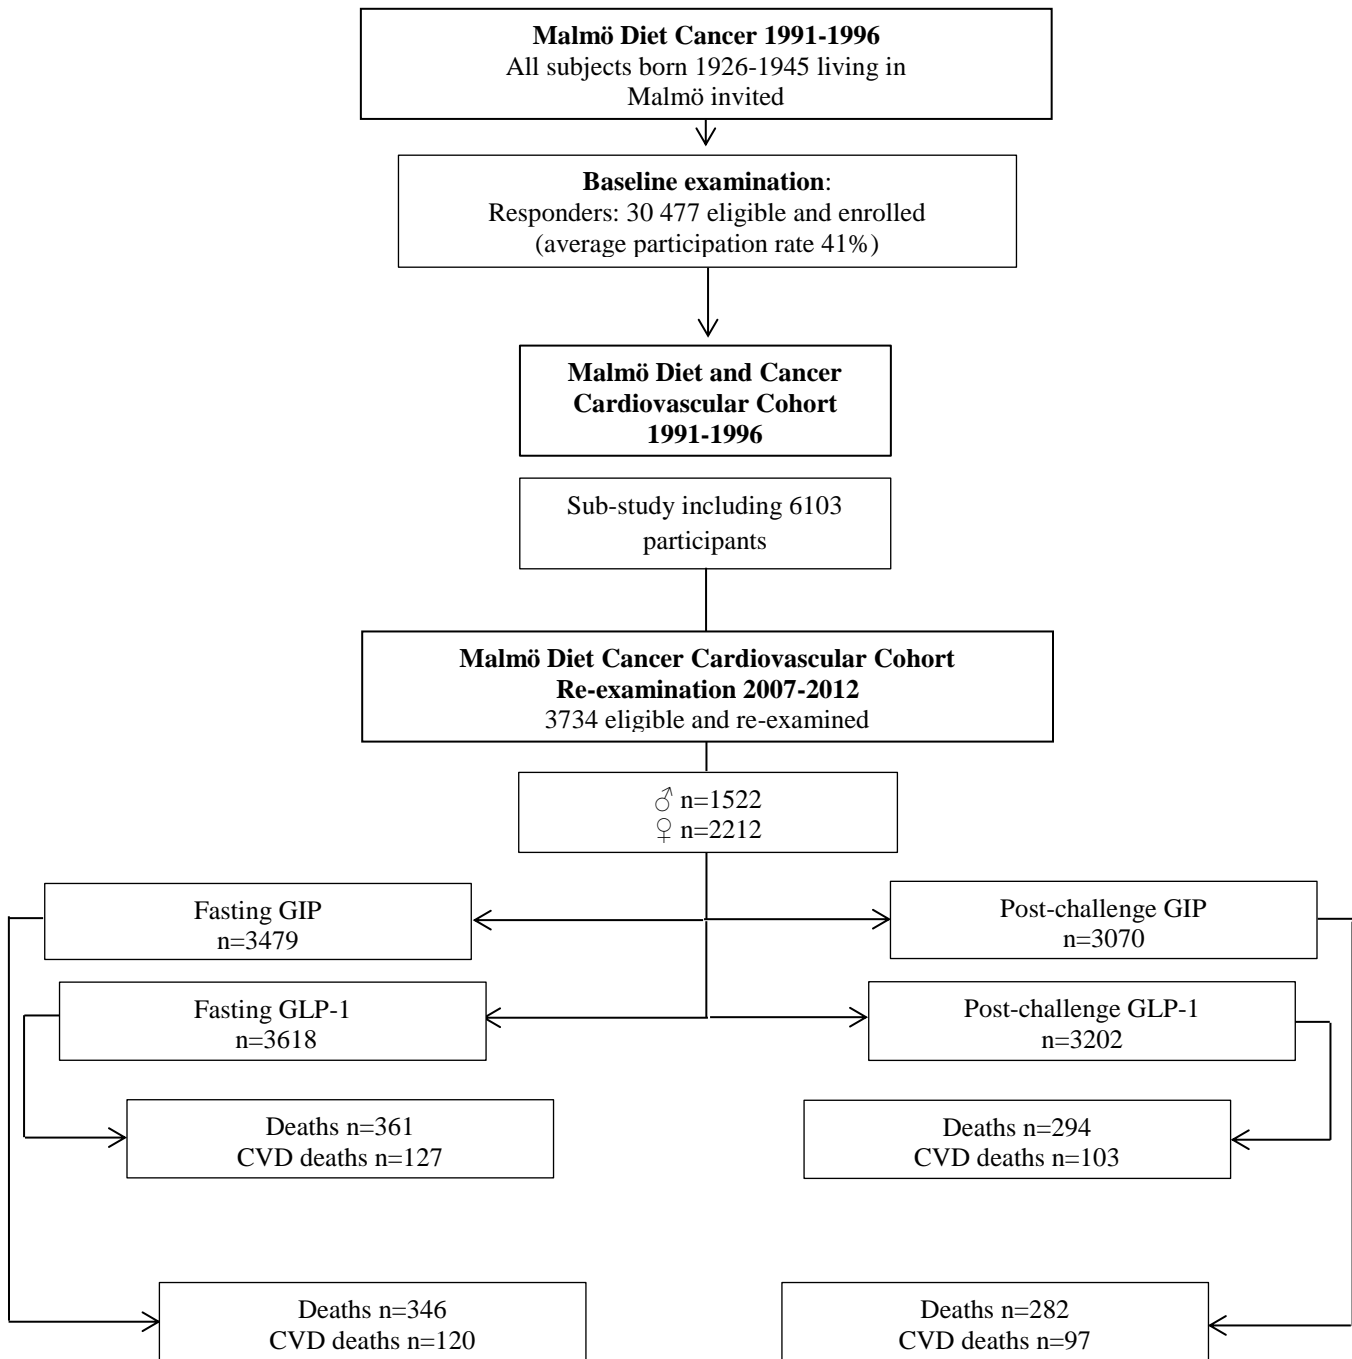

Supplement: 125_2020_5093_MOESM2_ESM.pdf [file 125_2020_5093_MOESM2_ESM.pdf]
